# Supplementary material for: Smad4 suppresses the tumorigenesis and aggressiveness of neuroblastoma through repressing the expression of heparanase
Source: PubMed Central journal article supplement (PMC5011643; doi:10.1038/srep32628), 2016-09-06
Supplement: srep32628-s1.pdf [file srep32628-s1.pdf]

# **Smad4 suppresses the tumorigenesis and aggressiveness of neuroblastoma through repressing the expression of heparanase**

**Hongxia Qu<sup>1,#</sup>, Liduan Zheng<sup>2,3,#</sup>, Wanju Jiao<sup>2,#</sup>, Hong Mei<sup>1</sup>, Dan Li<sup>1</sup>, Huajie Song<sup>1</sup>, Erhu Fang<sup>1</sup>, Xiaojing Wang<sup>1</sup>, Shiwang Li<sup>1</sup>, Kai Huang<sup>3</sup>, and Qiangsong Tong<sup>1,3,\*</sup>**

<sup>1</sup> Department of Pediatric Surgery, Union Hospital, Tongji Medical College, Huazhong University of Science and Technology, 1277 Jie Fang Avenue, Wuhan 430022, Hubei Province, P. R. China

<sup>2</sup> Department of Pathology, Union Hospital, Tongji Medical College, Huazhong University of Science and Technology, 1277 Jie Fang Avenue, Wuhan 430022, Hubei Province, P. R. China

<sup>3</sup> Clinical Center of Human Genomic Research, Union Hospital, Tongji Medical College, Huazhong University of Science and Technology, 1277 Jie Fang Avenue, Wuhan 430022, Hubei Province, P. R. China

## **Supplementary Figure Legends**

**Supplementary Figure S1 Mining the transcription factor crucial for HPSE expression. a**, over-lapping analysis revealing Smad4, LEF1, and PPARG as potential transcription factors of HPSE in NB. **b**, real-time quantitative RT-PCR and dual-luciferase assays showing the *PPARG* levels and *HPSE* promoter activity in NB cells. **c**, the correlation between *Smad4*, *LEF1*, and *HPSE* levels in NB or neuroblastic tumor tissues derived from R2 microarray analysis and visualization platform (<http://r2.amc.nl>).

**Supplementary Figure S2 Effects of TGF- $\beta$  on HPSE expression in NB cells. a**, nuclear run-on assay indicating the nascent transcript levels of *HPSE* in NB cells stably transfected with

mock, *Smad4*, sh-Scb, or sh-Smad4. **b**, dual-luciferase assay indicating the activity of Smad4 response element reporter (pSBE4-luc) and *HPSE* promoter reporter in NB cells stably transfected with sh-Scb or sh-Smad4, and those treated with TGF- $\beta$ . \*  $P < 0.01$  vs. mock or sh-Scb.

**Supplementary Figure S3 Effects of BMP-2 on HPSE expression in NB cells. a and b**, immunofluorescence and western blot assays indicating the localization of Smad4 and expression of HPSE in IMR32 and BE(2)-C cells stably transfected with mock or *Smad4*, and those treated with TGF- $\beta$  or LY364947. **c**, Co-IP and western blot assays showing the interaction of Smad4 with p-Smad1 or p-Smad2 in IMR32 cells stably transfected with mock, *Smad4*, *Smad4 (D351H)*, or *Smad4 (R361H)*. **d**, **e**, and **f**, western blot, real-time quantitative RT-PCR, and dual-luciferase assays indicating the expression levels and promoter activity of *HPSE* in NB cells stably transfected with mock, *Smad4*, *Smad4 (D351H)*, or *Smad4 (R361H)*. **g**, **h**, and **i**, dual-luciferase and real-time quantitative RT-PCR assays showing the activity of Smad4 response element reporter (pSBE4-luc) or BMP/Smad transcriptional reporter (pGL3-BRE-Luc), and *HPSE* transcript levels in NB cells transfected with activin A-neutralizing antibody, BMP-2, or LDN-193189, and those transfected with mock or *Smad4*. \*  $P < 0.01$  vs. mock;  $\Delta P < 0.01$  vs. control untreated with BMP-2 or LDN-193189.

**Supplementary Figure S4 Effects of Smad4 and LEF1 on the HPSE activity, growth, invasion, and angiogenesis of NB cells.** Dual-luciferase (**a**), colorimetric (**b**), MTT colorimetric (**c**), soft agar (**d**), matrigel invasion (**e**), tube formation (**f**) assays showing the cellular *HPSE* promoter activity, HPSE enzymatic activity, viability, growth, invasion, and angiogenesis capability of NB cells stably transfected with empty vector (mock) or *Smad4*, and those

co-transfected with *LEF1*. \*  $P < 0.01$  vs. mock.

**Supplementary Figure S5 Expression of Smad4, LEF1, and HPSE in public databases.** **a** and **b**, the datasets derived from Oncogenomics (<https://pob.abcc.ncifcrf.gov/cgi-bin/JK>) and TARGET (<https://target.nci.nih.gov/dataMatrix/>) indicating the copy number and mutation frequency of *Smad4* and *HPSE* in NB. **c** and **d**, the expression of *Smad4*, *LEF1*, and *HPSE* in NB tissues derived from R2 microarray analysis and visualization platform (<http://r2.amc.nl>).

**Supplementary Figure S6 Patients' survival analysis.** Kaplan–Meier survival plots of NB cases derived from R2 microarray analysis and visualization platform (<http://r2.amc.nl>) showing the survival probability of patients with high or low expression of Smad4 or HPSE.

**Supplementary Figure S7 Interaction between Smad4 and LEF1 in NB cells.** Co-IP and western blot assays showing the interaction between Smad4 and LEF1 in IMR32 cells transfected with different Myc-tagged *Smad4* truncates and FLAG-tagged *LEF1* construct.

# Supplementary Figure S1

**a**

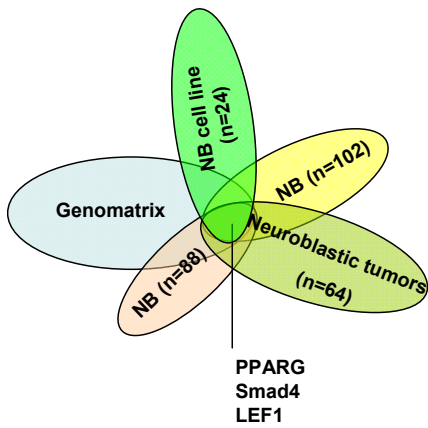

**b**

| Correlation between PPARG and HPSE expression |         |             |
|-----------------------------------------------|---------|-------------|
| R2 datasets                                   | R-value | P-value     |
| NB (n=102)                                    | 0.314   | 0.001326016 |
| NB (n=88)                                     | 0.249   | 0.019311638 |
| Neuroblastic tumor (n=64)                     | 0.411   | 0.000752421 |
| NB cell lines (n=24)                          | 0.487   | 0.015850924 |

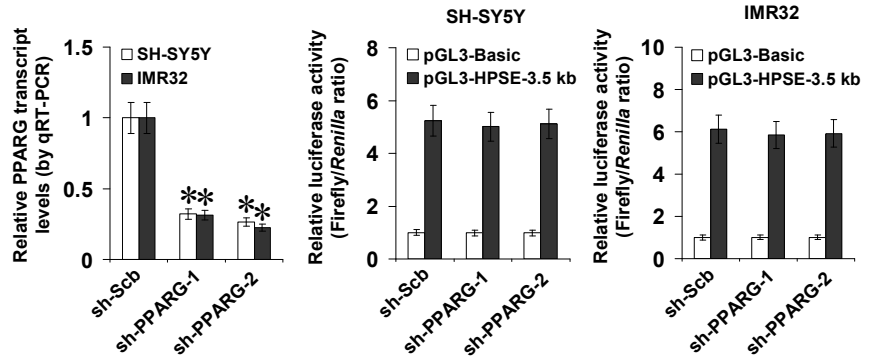

**c**

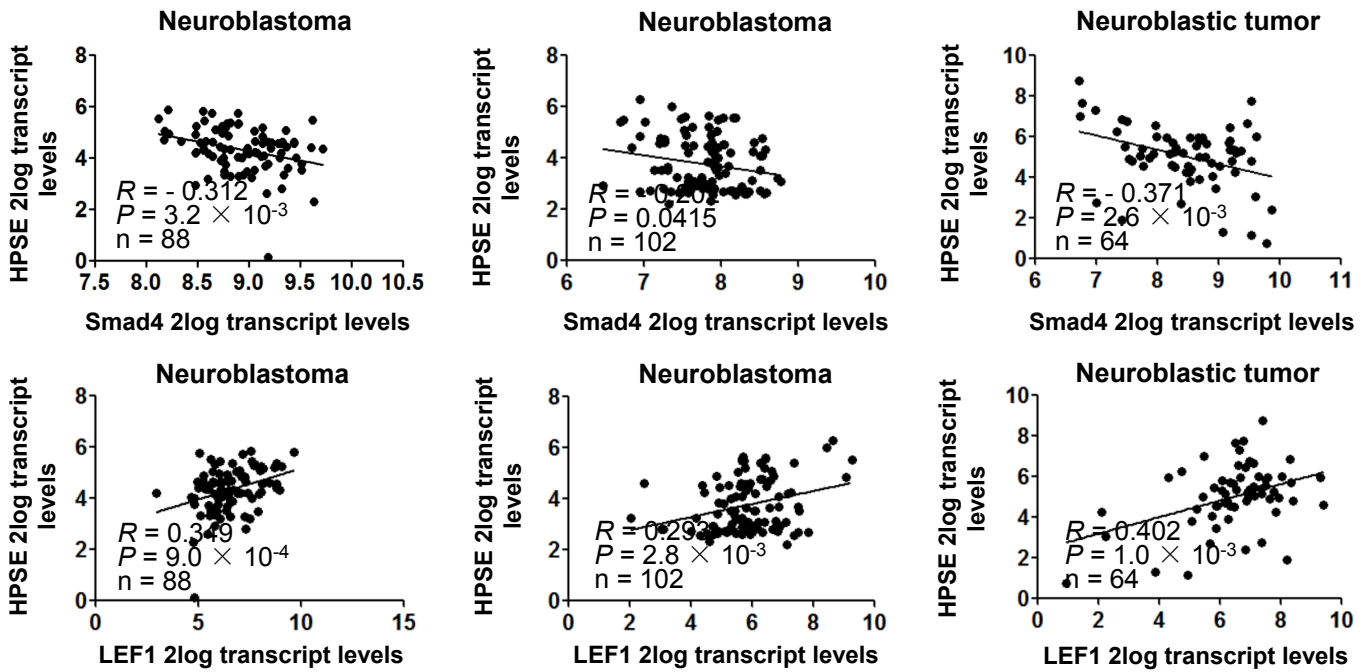

# Supplementary Figure S2

**a**

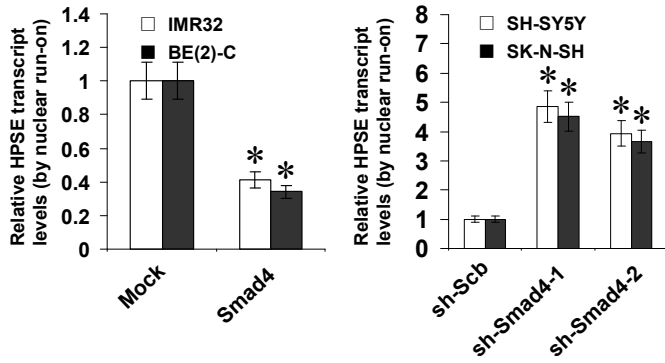

**b**

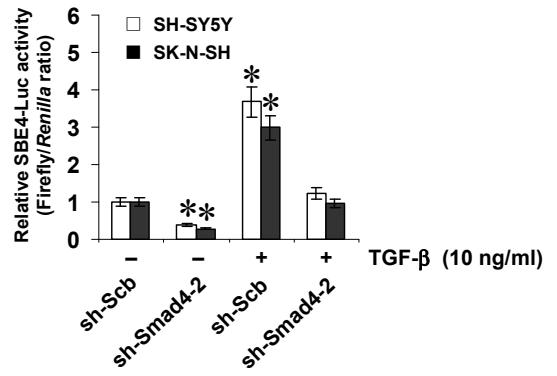

**c**

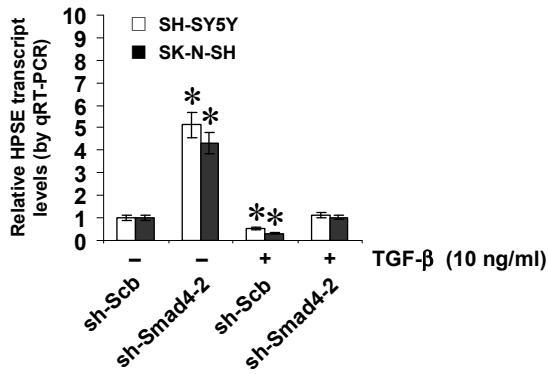

# Supplementary Figure S3

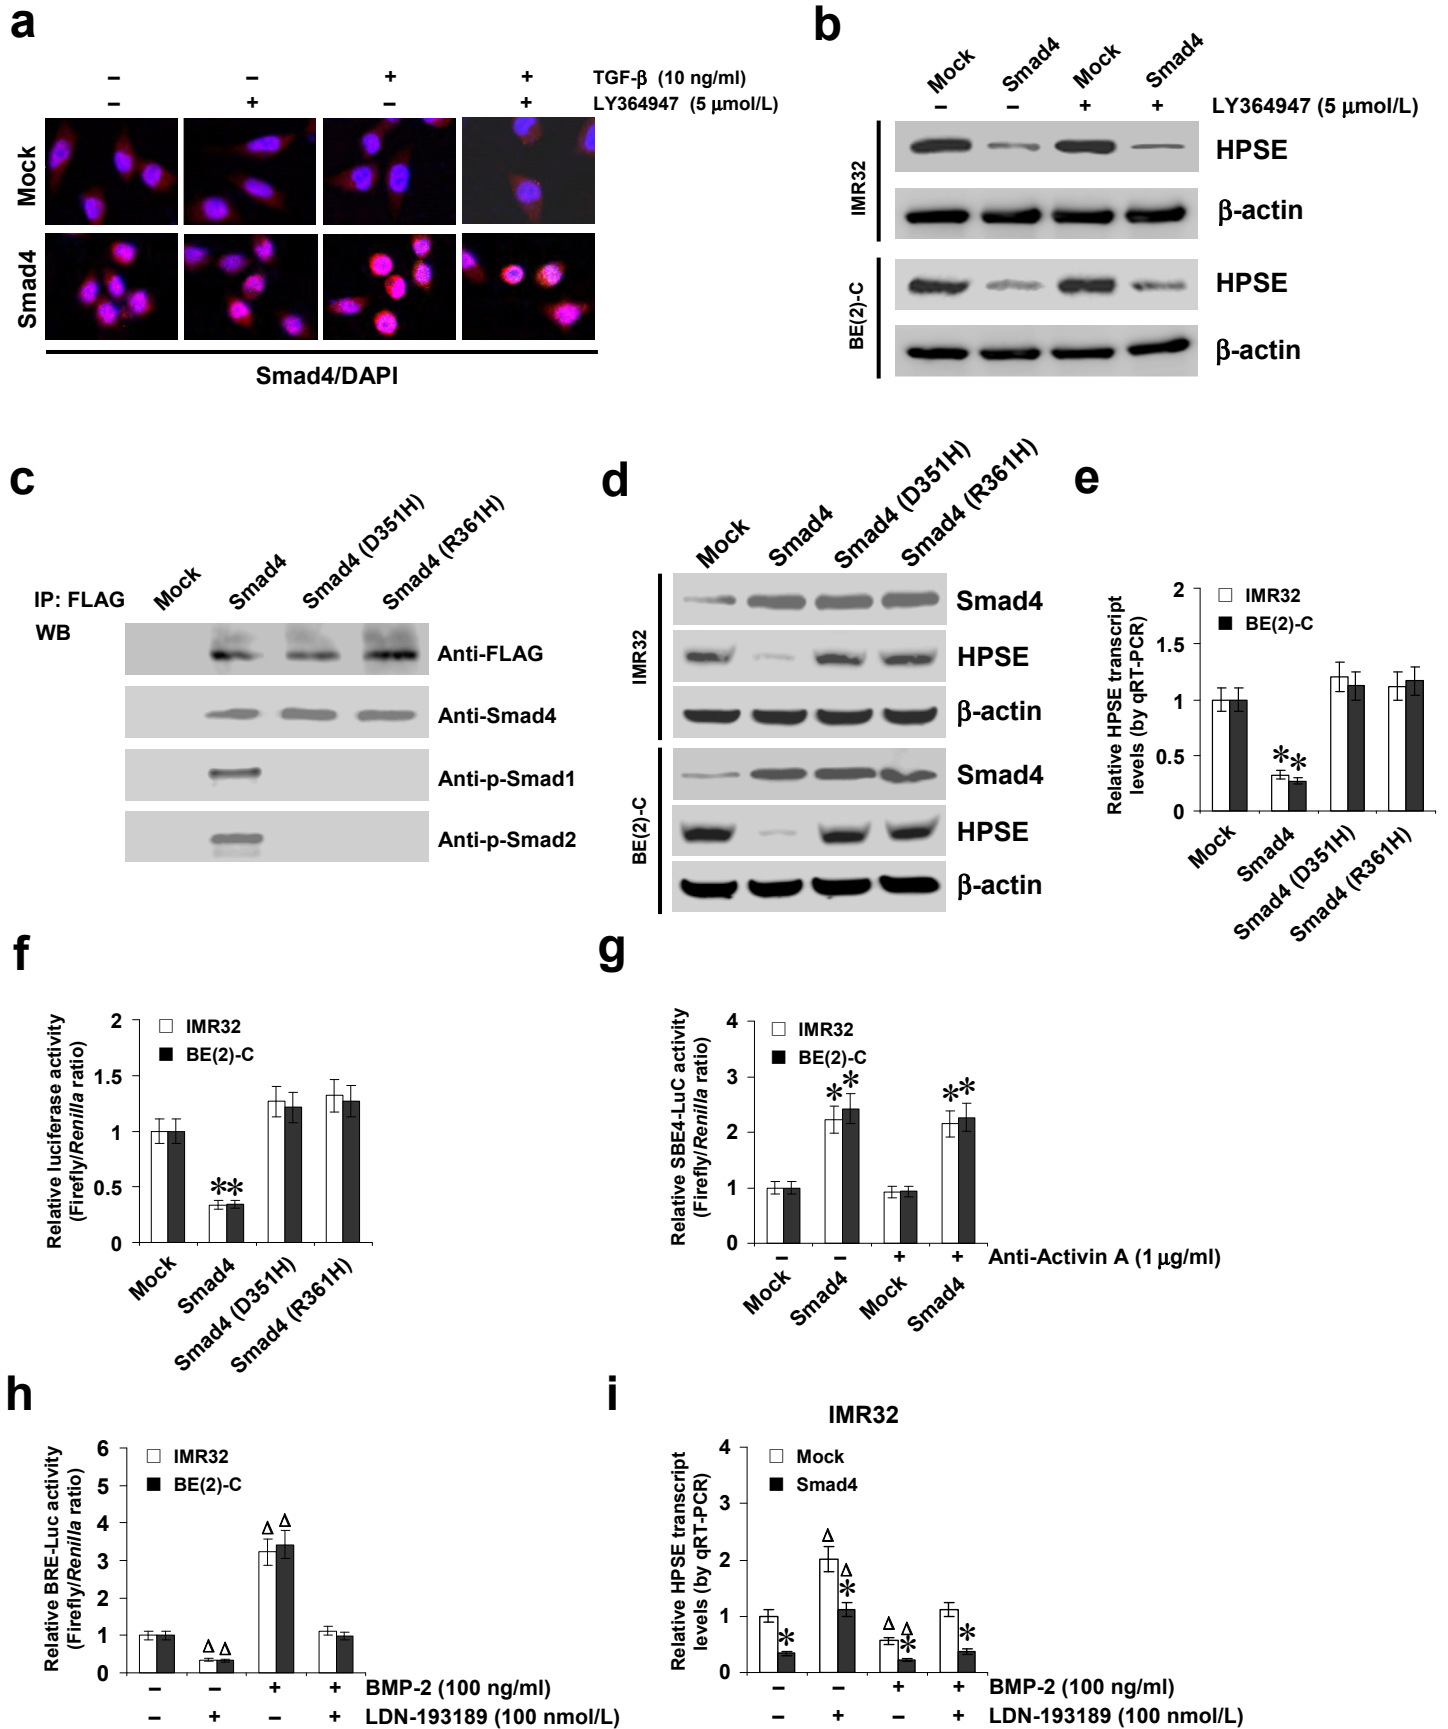

# Supplementary Figure S4

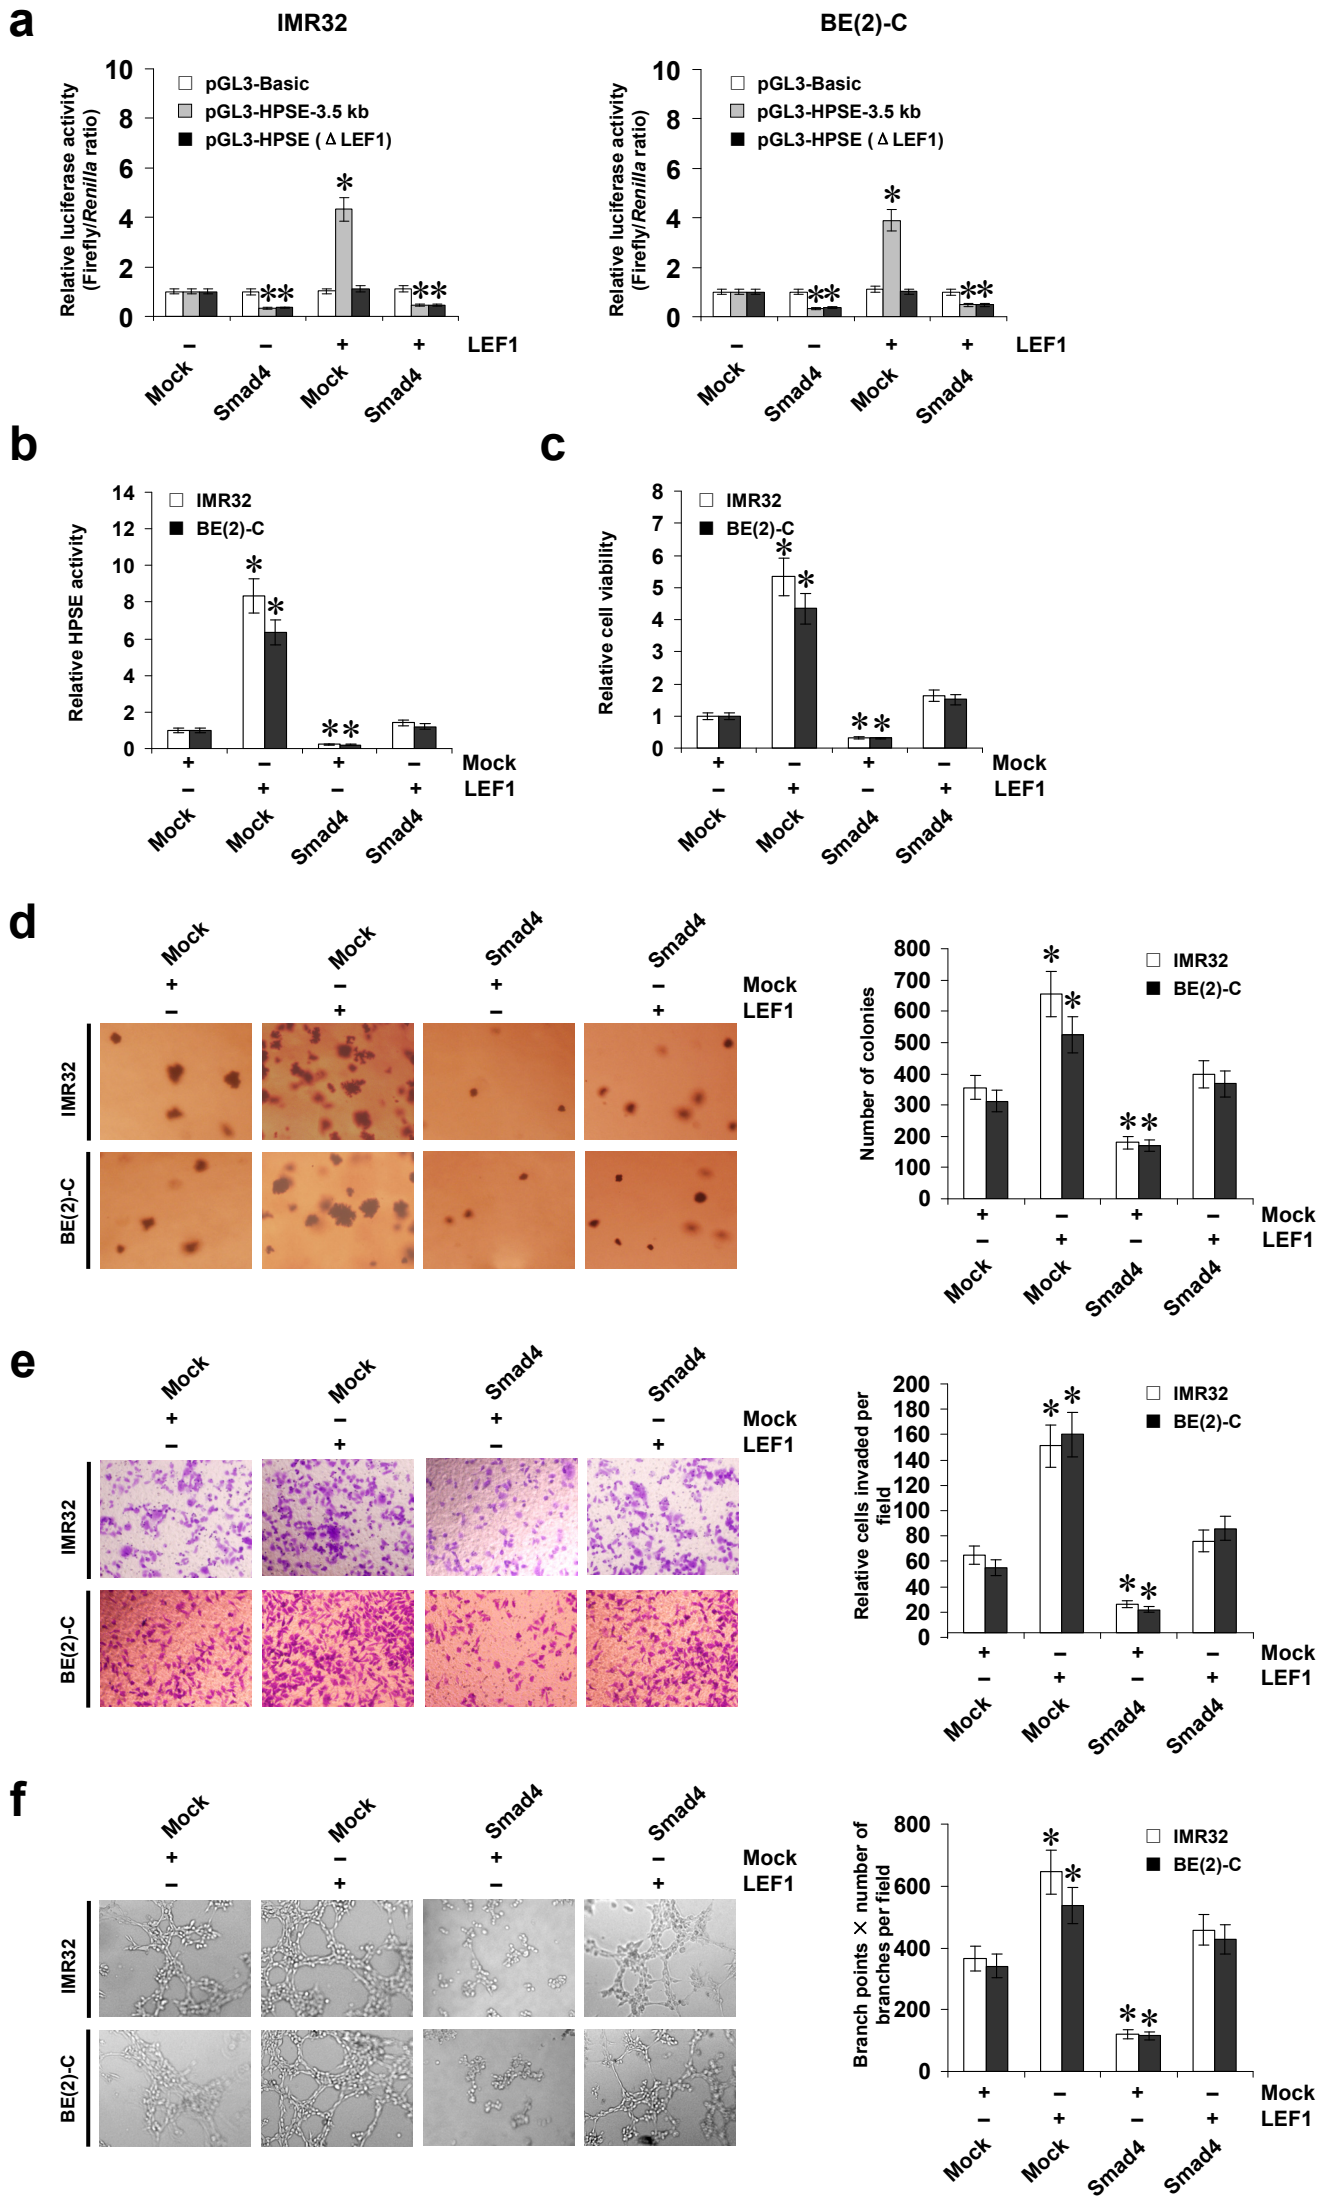

# Supplementary Figure S5

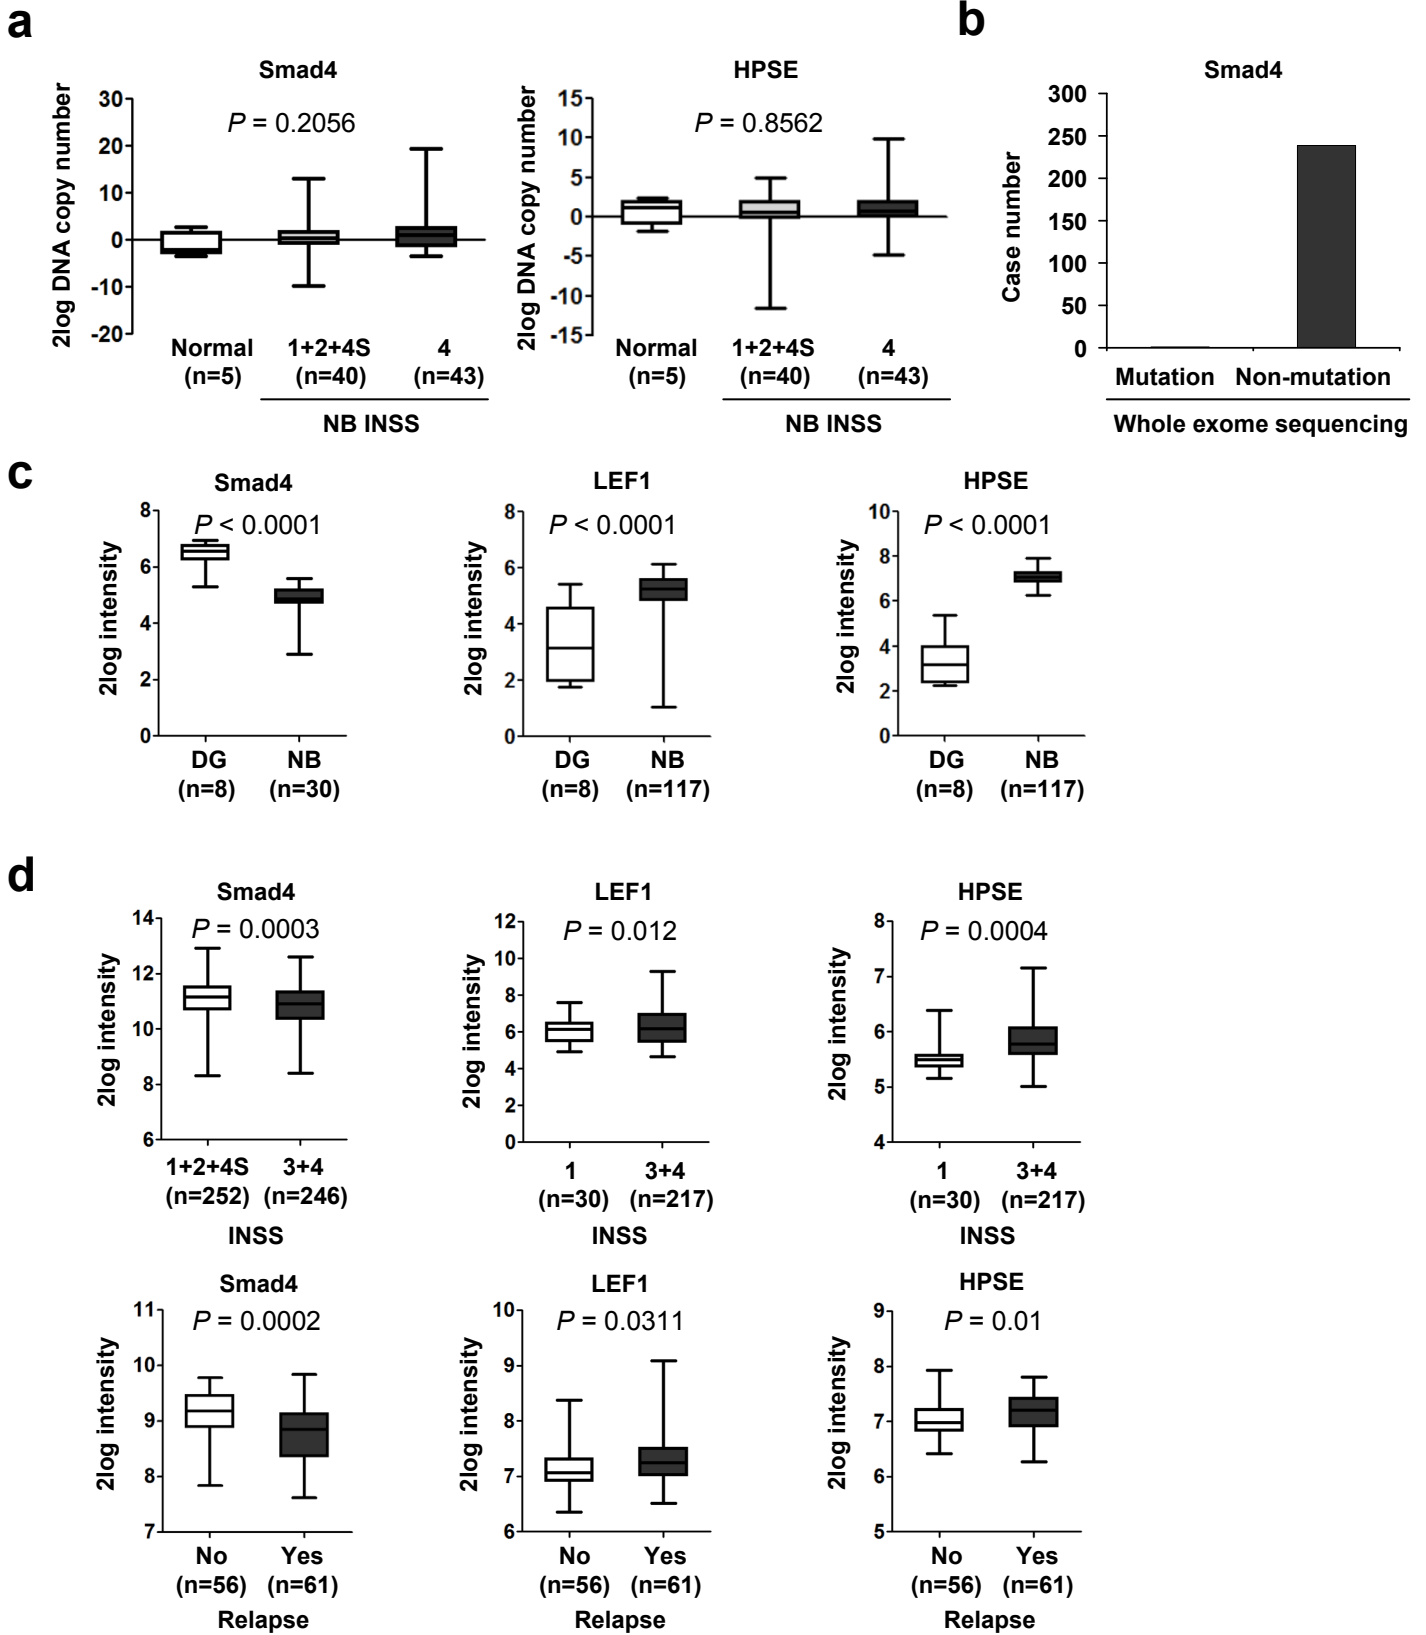



# Supplementary Figure S6

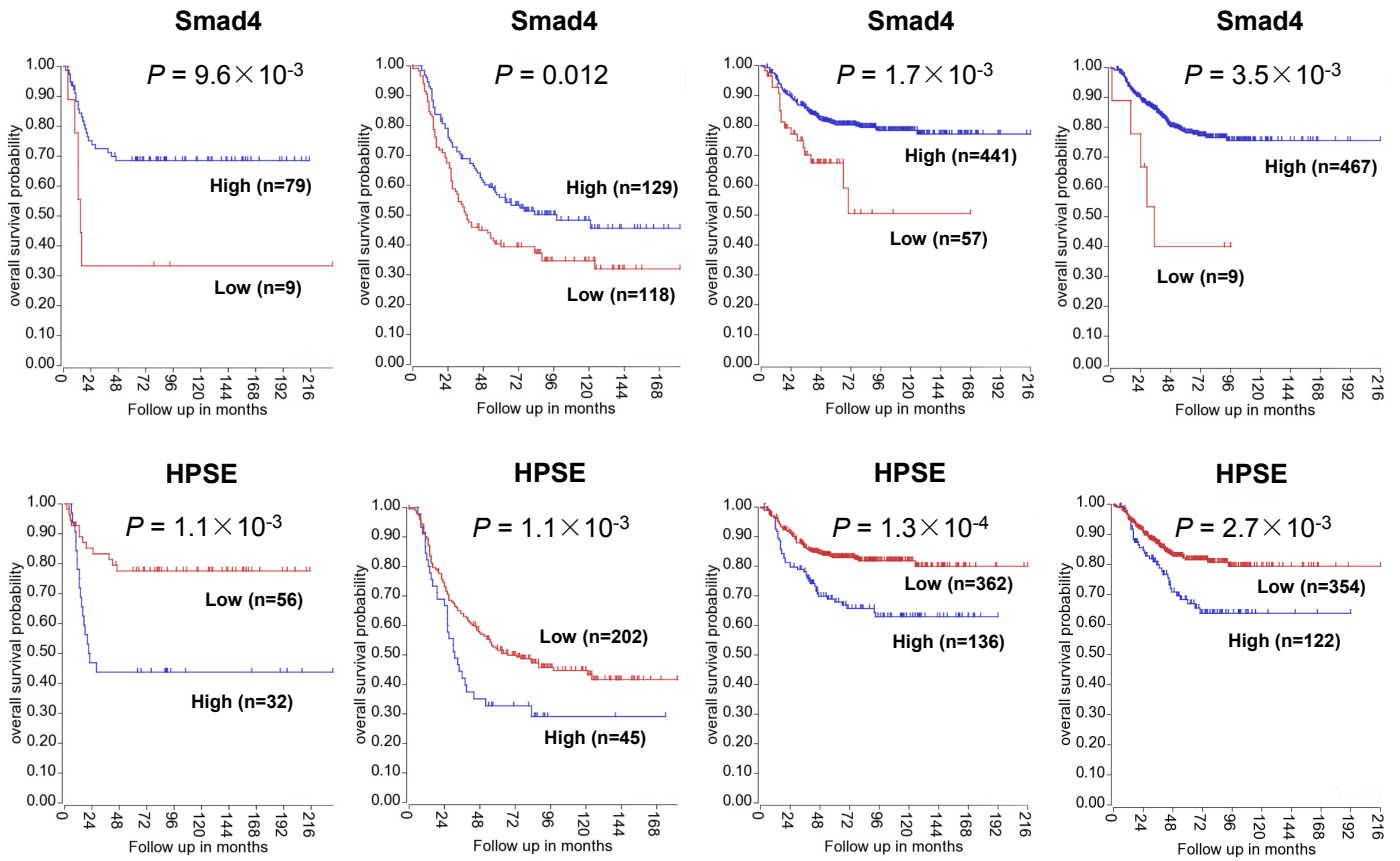

# Supplementary Figure S7

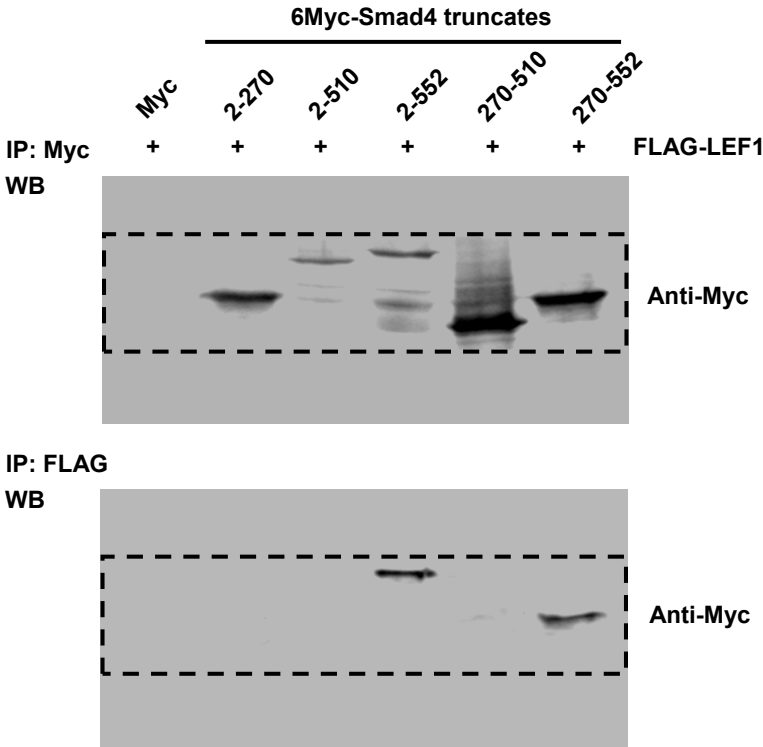

**Supplementary Table S1 Smad4 expression in human NB tissues**

| Group                 | Total number | Smad4 expression |   |    |     | Positive rates (%) | P-Value |
|-----------------------|--------------|------------------|---|----|-----|--------------------|---------|
|                       |              | -                | + | ++ | +++ |                    |         |
| Age                   |              |                  |   |    |     |                    |         |
| <1 year               | 20           | 12               | 3 | 3  | 2   | 40.0               | 0.778   |
| ≥1 year               | 22           | 14               | 5 | 2  | 1   | 36.4               |         |
| Differentiation       |              |                  |   |    |     |                    |         |
| Well differentiated   | 8            | 0                | 2 | 3  | 3   | 100.0              | <0.001  |
| Poorly differentiated | 28           | 21               | 5 | 2  | 0   | 25.0               |         |
| Undifferentiated      | 6            | 5                | 1 | 0  | 0   | 16.7               |         |
| MKI                   |              |                  |   |    |     |                    |         |
| <200                  | 17           | 6                | 3 | 5  | 3   | 64.7               | 0.002   |
| >200                  | 25           | 20               | 5 | 0  | 0   | 20.0               |         |
| INSS stages           |              |                  |   |    |     |                    |         |
| Stage 1-2             | 14           | 4                | 3 | 4  | 3   | 71.4               | 0.016   |
| Stage 3-4             | 20           | 16               | 4 | 0  | 0   | 20.0               |         |
| Stage 4S              | 8            | 6                | 1 | 1  | 0   | 25.0               |         |

Smad4, SMAD family member 4; MKI, mitosis karyorrhexis index; INSS, international neuroblastoma staging system.

**Supplementary Table S2 Correlation among the expression of Smad4, LEF1, and HPSE**

|                        | Smad4 expression |      |                 |                 | LEF1 expression |      |                 |                 |
|------------------------|------------------|------|-----------------|-----------------|-----------------|------|-----------------|-----------------|
|                        | Low              | High | <i>R</i> -value | <i>P</i> -value | Low             | High | <i>R</i> -value | <i>P</i> -value |
| <b>HPSE expression</b> |                  |      |                 |                 |                 |      |                 |                 |
| Low                    | 4                | 6    | - 0.583         | <0.001          | 8               | 2    | 0.553           | < 0.001         |
| High                   | 30               | 2    |                 |                 | 6               | 26   |                 |                 |

Smad4, SMAD family member 4; LEF1, lymphoid enhancer-binding factor 1; HPSE, heparanase; Pearson's correlation coefficient was applied to determine the expression correlation.

**Supplementary Table S3 Oligonucleotide sets used for constructs, inhibitors and short hairpin RNAs**

| <b>Oligo Set</b>           | <b>Sequences</b>                                                                                                                                                   |
|----------------------------|--------------------------------------------------------------------------------------------------------------------------------------------------------------------|
| pcDNA3.1-Smad4             | 5'-CGCGGATCCATGGACAATATGTCTATTACG-3' (sense);<br>5'-CCGCTCGAGTCAGTCTAAAGGTTGTGGGTC-3' (antisense)                                                                  |
| pEF-FLAG-Smad4<br>(D351H)  | 5'-TGTTACTGTTTCATGGATACGTGGACCCTTCTGGAGGAGATCG-3' (sense);<br>5'-CACGTATCCATGAACAGTAACAATAGGGCAGCTTGAAGGAAC-3' (antisense)                                         |
| pEF-FLAG-Smad4<br>(R361H)  | 5'-GGAGGAGATCACTTTTGTGGTCAACTCTCCAATGTCCAC-3' (sense);<br>5'-CCAAACAAAAGTGATCTCCTCCAGAAGGGTCCACGTATCCAT-3' (antisense)                                             |
| pcDNA3.1-HPSE              | 5'-CGGGGTACCATGCTGCTGCGCTCGAAGCCTG-3' (sense);<br>5'-CCGCTCGAGTCAGATGCAAGCAGCAACTTTGG-3' (antisense)                                                               |
| pCMV-3Tag-1A-LEF1          | 5'-CGCGGATCCATGCCCAACTCTCCGGAGGAGGT-3' (sense);<br>5'-CCCAAGCTTTCAGATGTAGGCAGCTGTCATTCT-3' (antisense)                                                             |
| pGL3-HPSE mut<br>(Δ Smad4) | 5'-TGTGAGGCCGCTGAGGGCAGATCGCGAGGTCAGGAGATTGAGACC-3' (sense);<br>5'-GCGATCTGCCCTCAGCGGCCTCACAAAATGCTAGGATTGCAGGCA-3' (antisense)                                    |
| pGL3-HPSE mut<br>(Δ LEF1)  | 5'-TTTGGGTGGCGACTCTCTTTCCAGCTGCAGTTTAGCGTATGCTG-3' (sense);<br>5'-CTGGAAAGAGAGTCGCCACCCAAAATTCTTTATCAACTTCTCATT-3' (antisense)                                     |
| sh-Scb                     | 5'-CCGGGCGAACGATCGAGTAAACGGACTCGAGTCCGTTTACTCGATCGTTTCGCTTTT<br>T-3' (sense);<br>5'-AATTCAAAAAGCGAACGATCGAGTAAACGGACTCGAGTCCGTTTACTCGATCGTTTC<br>GC-3' (antisense) |
| sh-Smad4-1                 | 5'-CCGGGCAGACAGAAACTGGATTAAGTTCGAGTTTAATCCAGTTTCTGTCTGCTTTT<br>T-3' (sense);<br>5'-AATTCAAAAAGCAGACAGAAACTGGATTAAGTTCGAGTTTAATCCAGTTTCTGTCTG<br>C-3' (antisense)   |
| sh-Smad4-2                 | 5'-CCGGCCTGAGTATTGGTGTTCATTCTCGAGAATGGAACACCAATACTCAGGTTTT<br>T-3' (sense);<br>5'-AATTCAAAAACCTGAGTATTGGTGTTCATTCTCGAGAATGGAACACCAATACTCAG<br>G-3' (antisense)     |
| sh-PPARG-1                 | 5'-CCGGGCGCCTGCATCTCCACCTTATCTCGAGATAAGGTGGAGATGCAGGCGCTTT<br>TT-3' (sense);<br>5'-AATTCAAAAAGCGCCTGCATCTCCACCTTATCTCGAGATAAGGTGGAGATGCAGGC<br>GC-3' (antisense)   |
| sh-PPARG-2                 | 5'-CCGGGCGAAGCTTATCTATGACAGACTCGAGTCTGTCATAGATAAGCTTCGCTTTT<br>T-3' (sense);<br>5'-AATTCAAAAAGCGAAGCTTATCTATGACAGACTCGAGTCTGTCATAGATAAGCTTCG<br>C-3' (antisense)   |

Smad4, SMAD family member 4; HPSE, heparanase; LEF1, lymphoid enhancer-binding factor 1; sh-Scb, scramble short hairpin RNA; PPARG, peroxisome proliferator-activated receptor gamma.

**Supplementary Table S4 Primer sets used for qRT-PCR, nuclear run-on, and ChIP**

| Primer set                  | Primers | Sequence                        | Product size (bp) | Application                |
|-----------------------------|---------|---------------------------------|-------------------|----------------------------|
| HPSE                        | Forward | 5'-GAATGGACGGACTGCTAC-3'        | 261               | qRT-PCR,<br>nuclear run-on |
|                             | Reverse | 5'-CCAAAGAATACTTGCCTCA-3'       |                   |                            |
| Smad4                       | Forward | 5'-TGCCTCACCACCAAACGG-3'        | 255               | qRT-PCR                    |
|                             | Reverse | 5'-CCAAACAAAAGCGATCTCCTCC-3'    |                   |                            |
| LEF1                        | Forward | 5'-AAATAAAGTGCCCGTGGTGC-3'      | 280               | qRT-PCR                    |
|                             | Reverse | 5'-TGAGGATGGGTAGGGTTGCC-3'      |                   |                            |
| PPARG                       | Forward | 5'-GAACGACCAAGTAACTCTCCTC-3'    | 166               | qRT-PCR                    |
|                             | Reverse | 5'-GGGCTCCATAAAGTCACCAAAA-3'    |                   |                            |
| $\beta$ -actin              | Forward | 5'-ATCTACGAGGGGTATGCC-3'        | 227               | qRT-PCR                    |
|                             | Reverse | 5'-TAGCTCTTCTCCAGGGAG-3'        |                   |                            |
| HPSE Set 1<br>(-2347/-2148) | Forward | 5'-AAATTGGTATGACTGGGCATGG-3'    | 200               | ChIP                       |
|                             | Reverse | 5'-TCAGCCTCCCGAGTAGCTGGGACTA-3' |                   |                            |
| HPSE Set 2<br>(-1505/-1268) | Forward | 5'-ACCTTTGGCCTCCCAAATGCTGG-3'   | 238               | ChIP                       |
|                             | Reverse | 5'-GGCATGTGATCATGTTGGTGCTTA-3'  |                   |                            |
| HPSE Set 3<br>(-673/-476)   | Forward | 5'-ACACTTTGTATGGGGGCTTCAG-3'    | 198               | ChIP                       |
|                             | Reverse | 5'-CTCTGGCAAGGCAGTTTCTCAG-3'    |                   |                            |

HPSE, heparanase; Smad4, SMAD family member 4; LEF1, lymphoid enhancer-binding factor 1; PPARG, peroxisome proliferator-activated receptor gamma.
